# Supplementary material
Source: Springer Nature journal article supplement (https://www.springermedizin.de/resource/supplementary/12889_2008_1152_MOESM2_ESM.pdf/9502566)
Supplement: MOESM2 [file 9502566]

**560 randomly selected  
older people aged  $\geq 65$**

**280 randomly sent  
questionnaires**

**280 randomly not  
sent questionnaires**

**116 recruited  
into PA study**

**164 not  
recruited into  
PA study**

**124 recruited  
into PA study**  
(questionnaires completed  
at recruitment)

**156 not  
recruited into  
PA study**

**76 returned  
questionnaires**

**88 did not  
return  
questionnaires**
